# Supplementary material
Source: PubMed Central journal article supplement (PMC9433400)

**Fig 3A Raw blots**

**CRABP1**

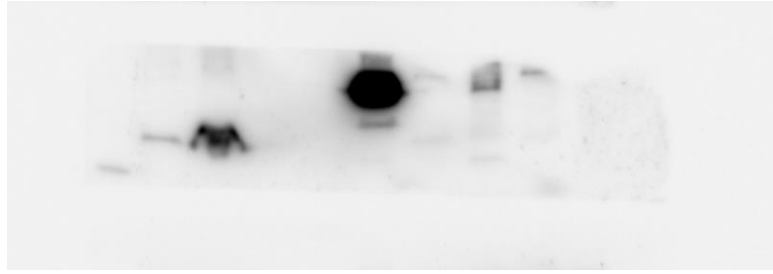

**$\beta$ -ACTIN**

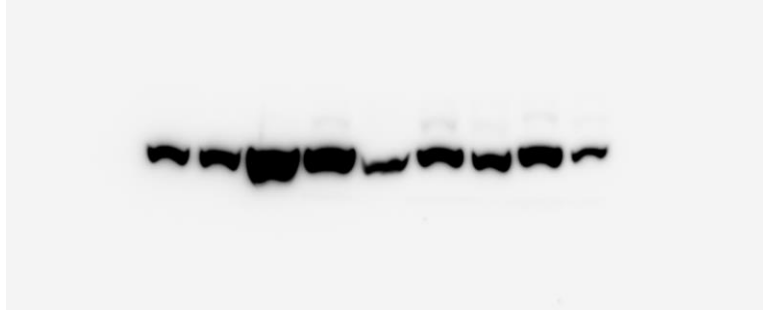

**Fig 3B Raw blots**

**CRABP1**

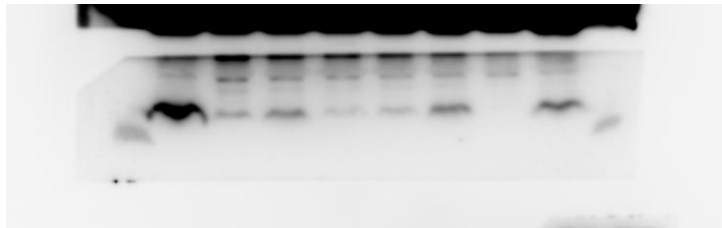

**NeuN**

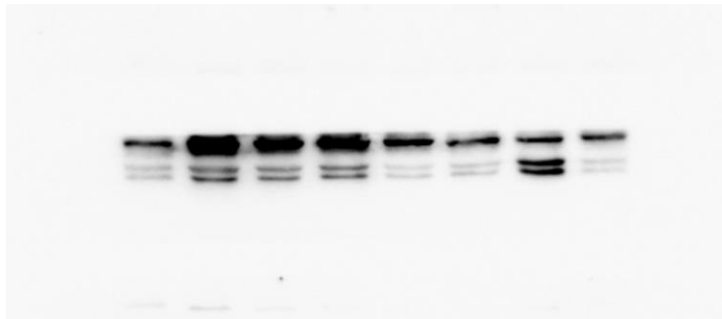

**$\beta$ -ACTIN**

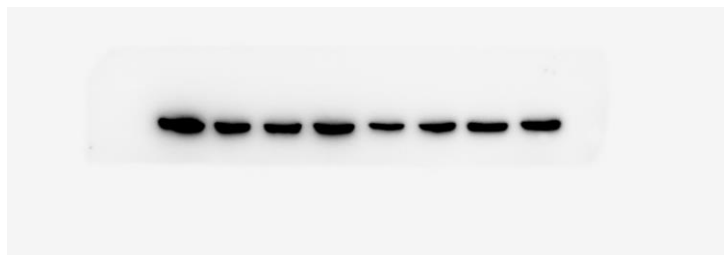

**Fig 6A Raw blots**

**PT286-CaMKII**

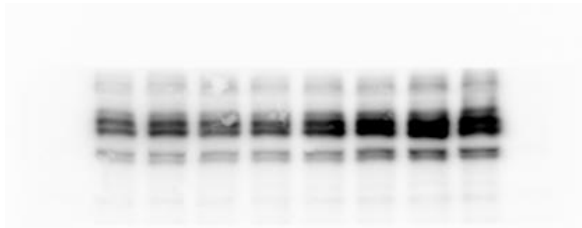

**CaMKII $\beta$  ->  
CaMKII $\alpha$  ->**

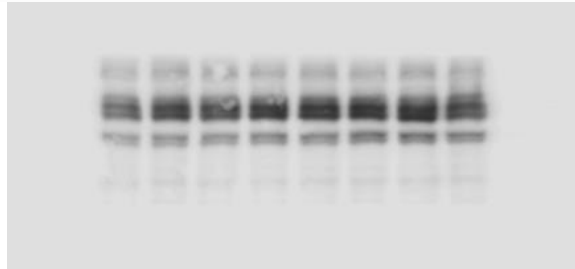

**PT306-CaMKII**

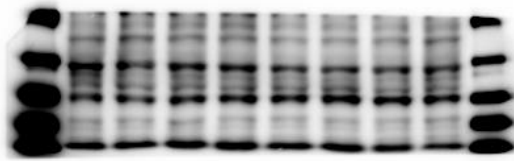

**CaMKII $\beta$  ->  
CaMKII $\alpha$  ->**

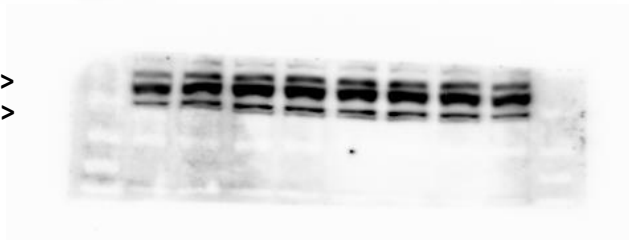

**AGRIN**

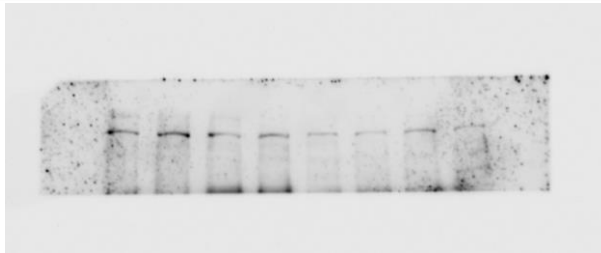

**CRABP1**

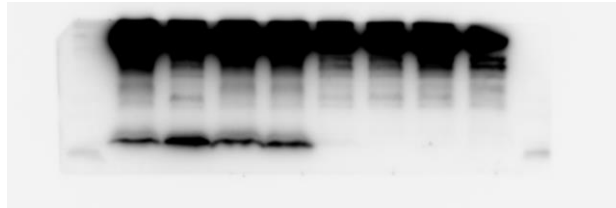

**$\beta$ -ACTIN**

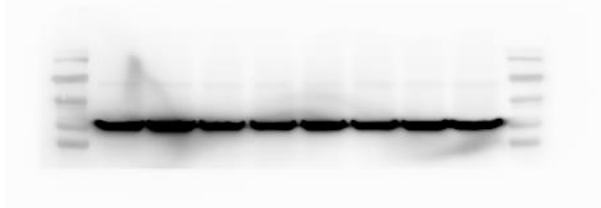

**Fig 6D Raw blots**

**Left:**

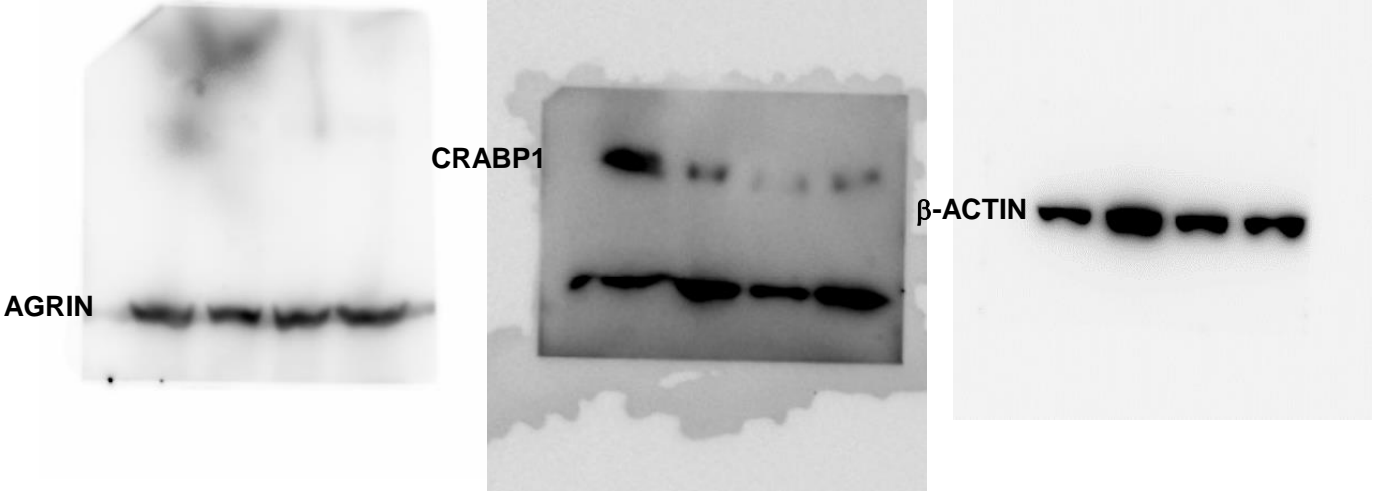

**Right: Quantification**

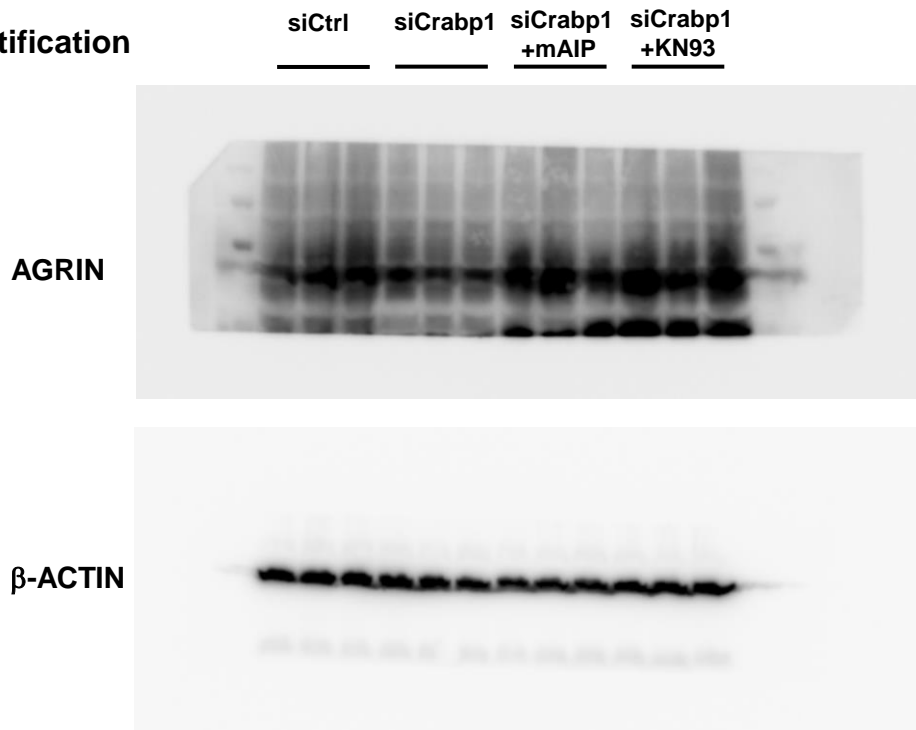

**Fig 6F Raw blots**

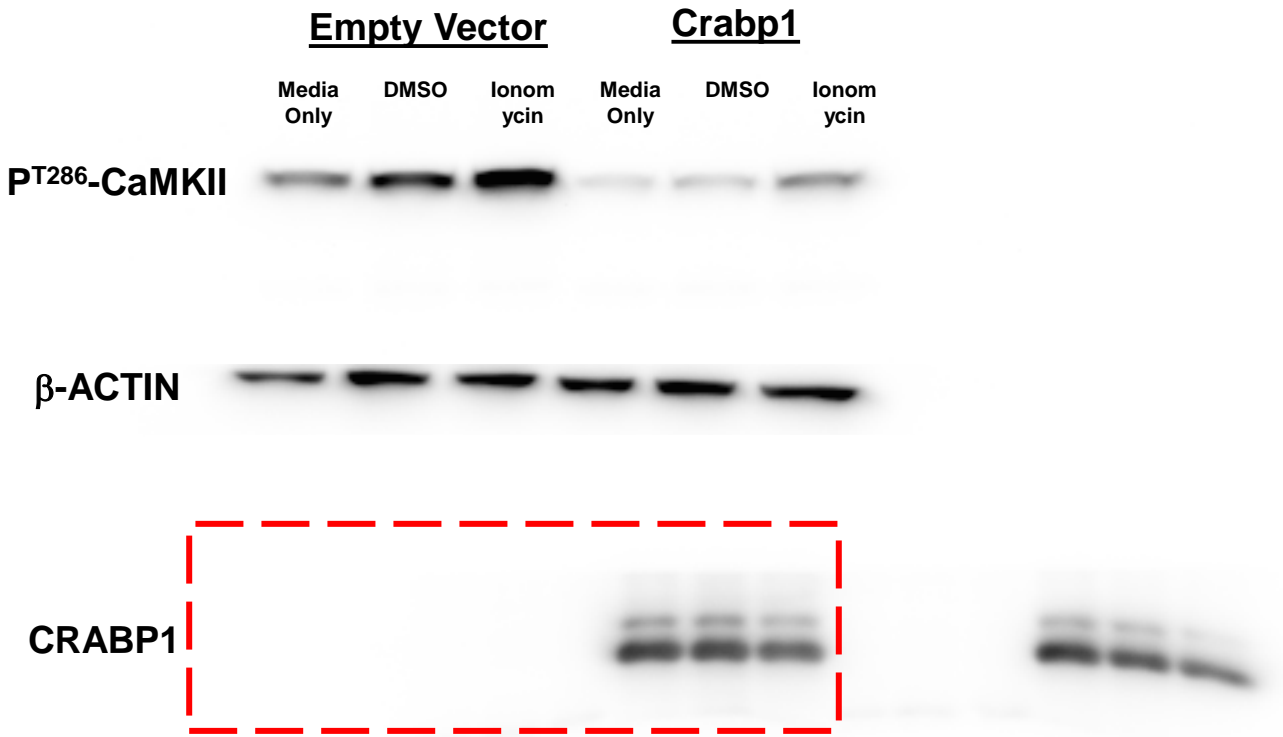

Red box indicates where the blot was cropped for the Figure.

**Fig 6G Raw blots**

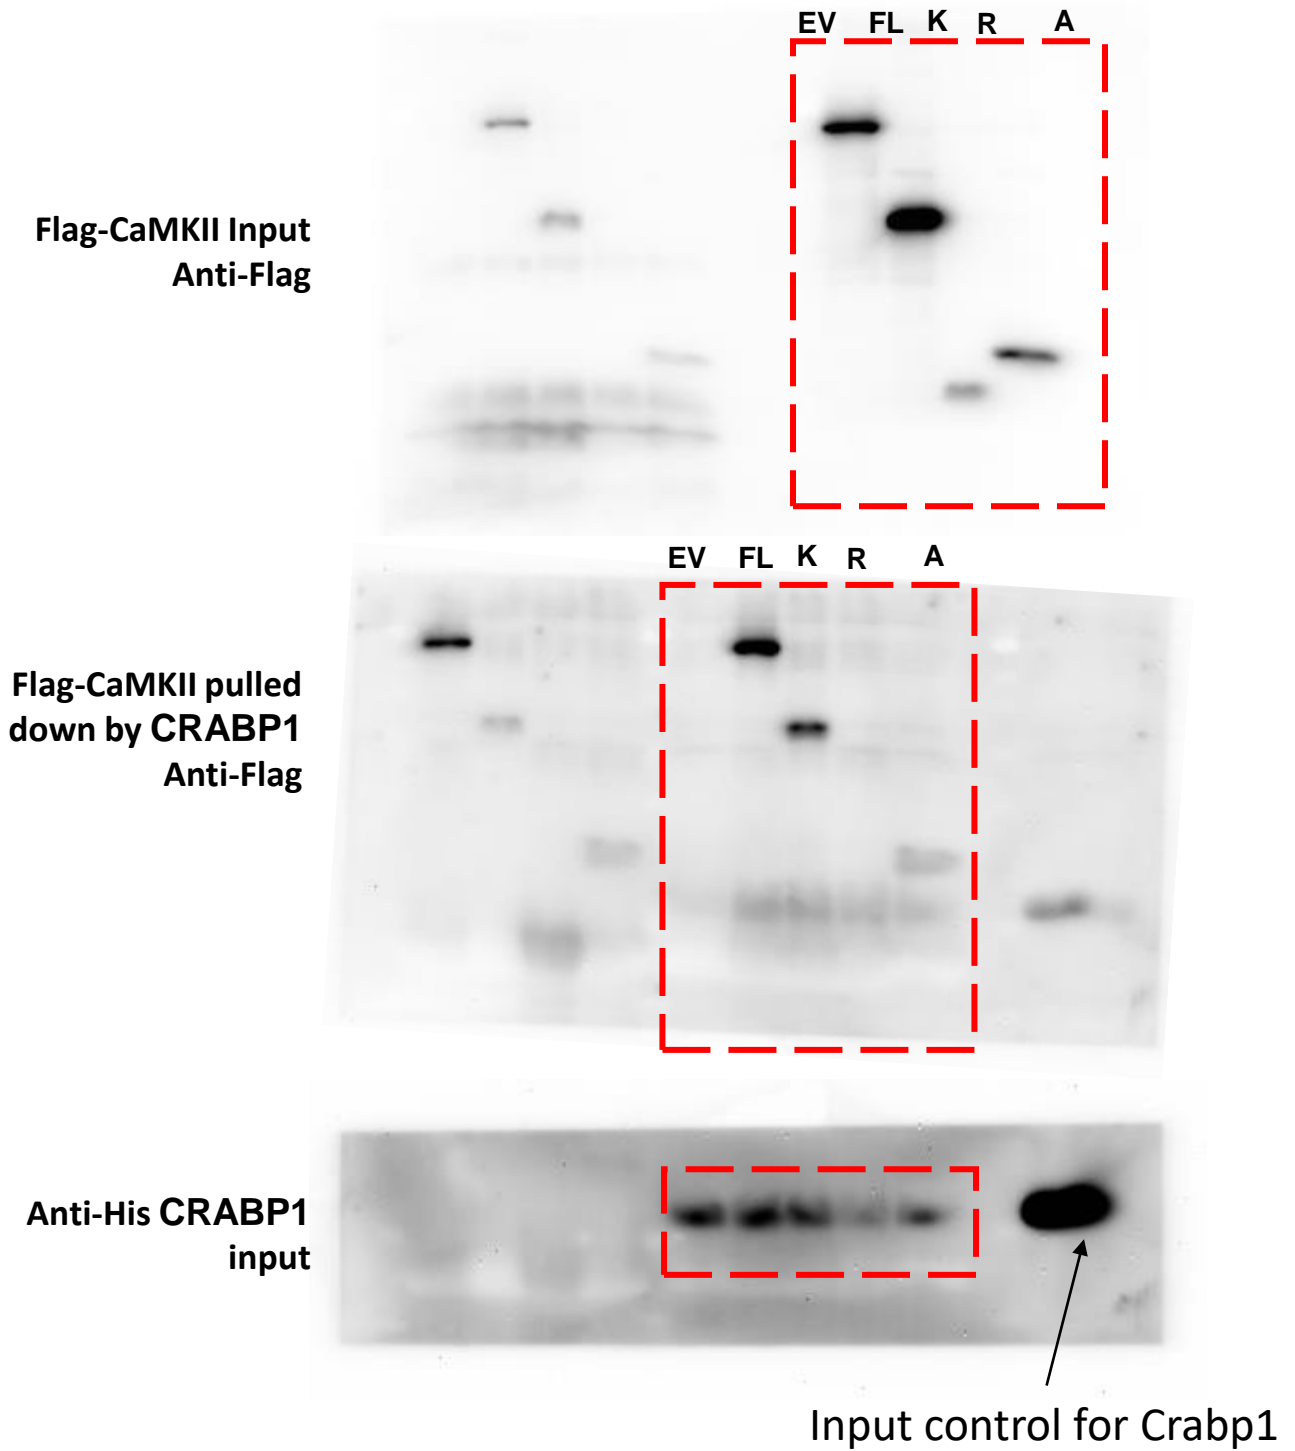

Red boxes indicate where the blot was cropped for the figure.

**Fig 7B Raw blots**

**GFP**

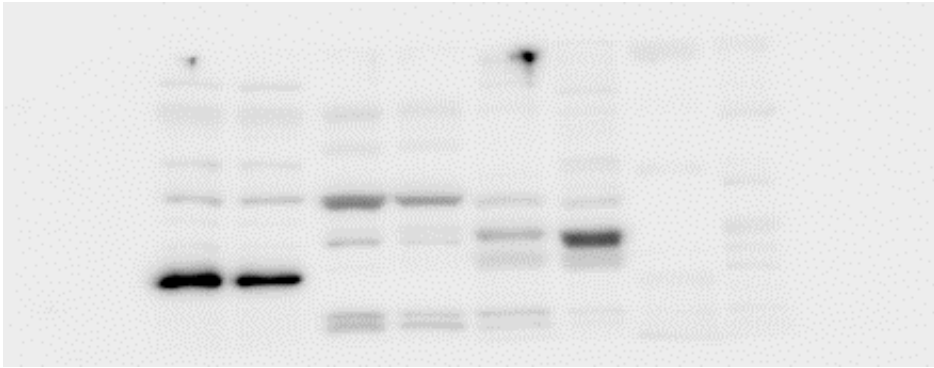

**$\beta$ -ACTIN**

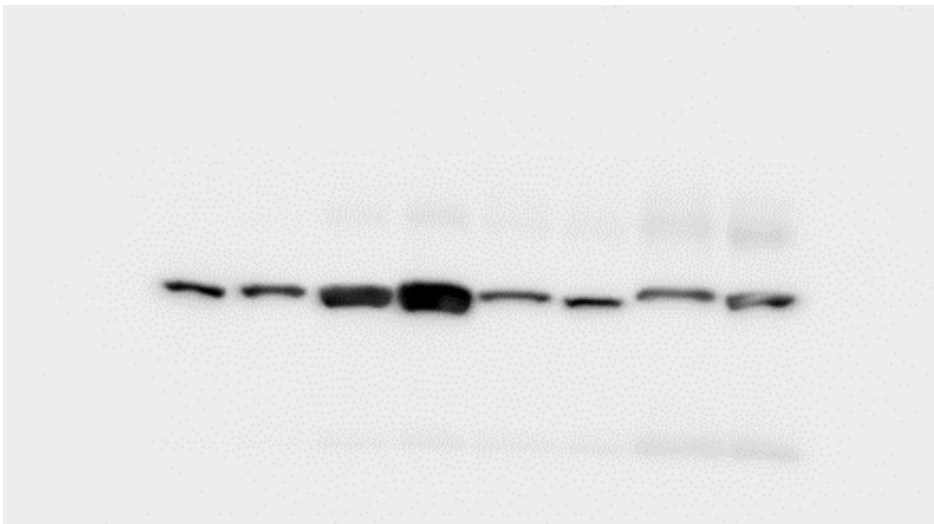

**AGRIN**

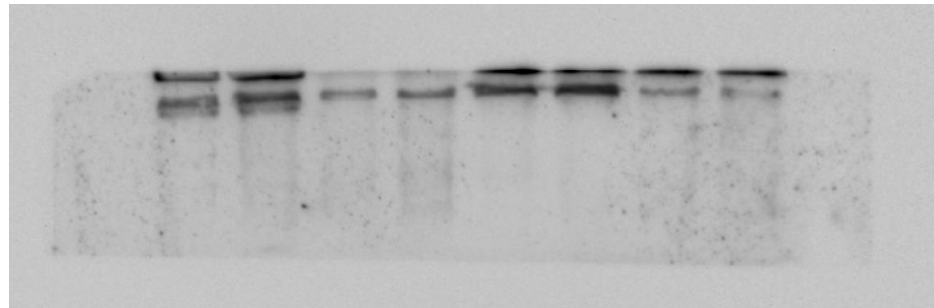

**CRABP1**

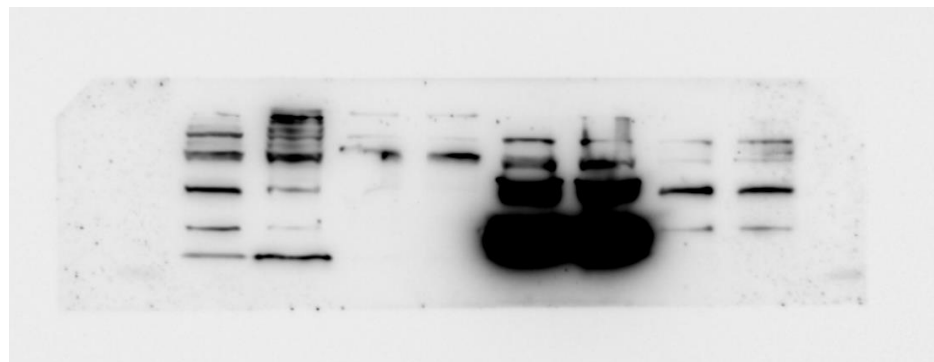

Supplement: 41418_2022_959_MOESM8_ESM.pdf [file 41418_2022_959_MOESM8_ESM.pdf]
