# Supplementary material
Source: PubMed Central journal article supplement (PMC9433400)
Supplement: 41418_2022_959_MOESM10_ESM.pdf [file 41418_2022_959_MOESM10_ESM.pdf]

**Table S1. Primer for motor neuron genes**

| <b>Gene</b>   | <b>Forward Primer</b>   | <b>Reverse Primer</b>  |
|---------------|-------------------------|------------------------|
| <b>Agrn</b>   | GGACTCAGAAGGCTCCAAGTGT  | GTCAGCCATCTCTGGTGTGTAG |
| <b>SYT2</b>   | CATGTTCCGCAAGCTGAAGGAG  | GATGCAGAAGCAACAGGTGAGC |
| <b>Snap25</b> | ATCAGTGGTGGCTTCATCCGCA  | TGGCGGAGGTTTCCGATGATGC |
| <b>Snapin</b> | TAATGCCAGGCGACGAGTTGTC  | CCTGAATCCAGCATAGCTCTCC |
| <b>Vamp1</b>  | GGAAGAAAGCAGTCAGTGTAGCC | GGAACATACGCTCCAGGCTTGG |
| <b>Vamp2</b>  | GAGCTGGATGACCGTGCAGATG  | ATGGCGCAGATCACTCCCAAGA |
| <b>Vamp3</b>  | AGACCAGAAGCTCTCGGAGCTA  | ACCAGGACACTGATCCCTATCG |
| <b>Unc13a</b> | TCGTGGATGAGTTTGCCATGCG  | GTAGGCGTTGATGTTGGCAAGC |
| <b>Unc13b</b> | ATGCGCTATGGCATCGAGTCCA  | CAGTAAGGTGCTCATCACGGCT |
| <b>ChAT</b>   | GCTTGAATGGAGCGAATCGTTGG | CACCAGGACGATGCCATCAAAG |
| <b>VACHT</b>  | CGTGTACCCTTTCTAGTGCTCG  | ATGAGGCGATGGATAGGTGTGC |
| <b>CHT</b>    | TCCATCCTGTGCGGCGAGTTCTA | TGCAGATGCTCCGAACACAAGC |
| <b>AChE</b>   | CTACACCACGGAGGAGAGGA    | CTGGTTCTTCCAGTGCACCA   |

**Table S2. Primer for muscle genes**

| <b>Gene</b>                      | <b>Forward Primer</b>  | <b>Reverse Primer</b>  |
|----------------------------------|------------------------|------------------------|
| <b>LRP4</b>                      | GGCAAAAAGCAGGAACTTGT   | TCTACCCAGTGGCCAGAACT   |
| <b>MuSK</b>                      | CCACACTGCGTGGAAATGAGC  | CTCTGCAAATGGGCATGGG    |
| <b>DOK7</b>                      | TCAGCCTCAGAAGAGCGTGTTG | GCCTCAGAAGAGGAACTGGATA |
| <b>Rapsyn</b>                    | GTGGATGAAGGTGCTGGAGAAG | CCGAGCAGTATCAATCTGGACC |
| <b>CDK5</b>                      | GTACTCCACGTCCATCGACATG | GCCATTGTTCTCAGTCGGTGT  |
| <b>AChE</b>                      | CTACACCACGGAGGAGAGGA   | CTGGTTCTTCCAGTGCACCA   |
| <b>AChR<math>\alpha</math>1</b>  | CTGACATCTCTGGGAAGCCG   | GGCGTTATTGGACTCCTGGT   |
| <b>AChR<math>\gamma</math></b>   | GCTCAGCTGCAAGTTGATCTC  | CCTCCTGCTCCATCTCTGTC   |
| <b>AChR<math>\epsilon</math></b> | GCTGTGTGGATGCTGTGAAC   | GCTGCCCAAAAACAGACATT   |

**Table S3. Information of Antibodies and dyes**

| <b>Protein</b>                      | <b>Company</b>         | <b>Catalog Number</b> |
|-------------------------------------|------------------------|-----------------------|
| $\alpha$ -actinin                   | Cell Signaling         | 6487S                 |
| $\beta$ -actin                      | SantaCruz              | SC-47778              |
| ChAT                                | EMD Millipore          | AB144P                |
| CRABP1                              | Sigma                  | HPA017203             |
| GFP                                 | SantaCruz              | SC-9996               |
| p <sup>T286</sup> -CaMKII (WB)      | Cell Signaling         | 12716S                |
| p <sup>T286</sup> -CaMKII (IF)      | SantaCruz              | SC32289               |
| p <sup>T306</sup> -CaMKII           | Antibodypedia          | P1005-306             |
| CaMKII $\alpha$                     | SantaCruz              | SC-13141              |
| CaMKII $\beta$                      | SantaCruz              | SC-376828             |
| Tuj1                                | Abcam                  | ab18207               |
| SV2-s                               | DSHB                   | SV2                   |
| Gt Anti-Ms IgG antibody (HRP)       | GeneTex                | GTX26789              |
| Gt Anti-Rb IgG antibody (HRP)       | Jackson immunoResearch | 800-367-5296          |
| Dk Anti-Rb IgG antibody (Alexa 594) | Jackson immunoResearch | 711-585-152           |
| Dk Anti-Rb IgG antibody (Alexa 488) | Abcam                  | ab150073              |
| Dk Anti-Gt IgG antibody (CFL 594)   | SantaCruz              | SC-362275             |
| Gt Anti-Ms IgG antibody (Cy5)       | Life Technologies      | A10524                |
| Gt Anti-Rb IgG antibody (Alexa 488) | Jackson immunoResearch | 111-546-144           |
| $\alpha$ BTX (CF 488)               | Biotium                | 00005                 |
| $\alpha$ BTX (CF 594)               | Biotium                | 00007                 |
